# 1 High resolution species detection: 2 accurate long read eDNA metabarcoding 3 of North Sea fish using Oxford Nanopore 4 sequencing

5 Karlijn Doorenspleet\*<sup>1</sup>, Lara Jansen\*<sup>1</sup>, Saskia Oosterbroek\*<sup>1</sup>, Oscar Bos<sup>2</sup>, Pauline Kamermans<sup>1,3</sup>, Max Janse<sup>4</sup>,  
6 Erik Wurz<sup>1</sup>, Albertinka Murk<sup>1</sup> & Reindert Nijland<sup>1†</sup>

7  
8 1) Marine Animal Ecology group, Wageningen University and Research, P.O. Box 338, 6700 AH,  
9 Wageningen, The Netherlands

10 2) Wageningen Marine Research, PO Box 57, 1780 AB Den Helder, The Netherlands

11 3) Wageningen Marine Research, PO Box 77, 4400 AB Yerseke, The Netherlands

12 4) Royal Burgers' Zoo, Antoon van Hooffplein 1, 6816 SH Arnhem, The Netherlands

13 \*) Contributed equally

14 †) Corresponding author: [reindert.nijland@wur.nl](mailto:reindert.nijland@wur.nl)

## 15 Abstract

16 To monitor the effect of nature restoration projects in North Sea ecosystems, accurate and intensive  
17 biodiversity assessments are vital. DNA based techniques and especially environmental DNA (eDNA)  
18 metabarcoding from seawater is becoming a powerful monitoring tool. However, current approaches are  
19 based on genetic target regions of <500 nucleotides, which offer limited taxonomic resolution. This study  
20 aims to develop and validate a long read nanopore sequencing method for eDNA that enables improved  
21 identification of fish species.

22 We designed a universal primer pair targeting a 2kb region covering the 12S and 16S rRNA genes of fish  
23 mitochondria. eDNA was amplified and sequenced using the Oxford Nanopore MiniON. Sequence data was  
24 processed using the new pipeline Decona, and accurate consensus identities of above 99.9% were  
25 retrieved. The primer set efficiency was tested with eDNA from a 3.000.000 L zoo aquarium with 31 species  
26 of bony fish and elasmobranchs. Over 55% of the species present were identified on species level and over  
27 75% on genus level. Next, our long read eDNA metabarcoding approach was applied to North Sea eDNA  
28 field samples collected at ship wreck sites, the Gemini Offshore Wind Farm, the Borkum Reef Grounds and

29 a bare sand bottom. Here, location specific fish and vertebrate communities were obtained. Incomplete  
30 reference databases still form a major bottleneck in further developing high resolution long read  
31 metabarcoding. Yet, the method has great potential for rapid and accurate fish species monitoring in  
32 marine field studies.

33 Keywords

34 eDNA, North Sea, metabarcoding, nanopore, long read, marine fish

35

## 36 Introduction

37 North Sea fish populations are sensitive to disturbances such as fisheries, nutrient run offs and increasing  
38 sea water temperatures (Andersen et al., 2020; Capuzzo et al., 2018; Hofstede, Hiddink, & Rijnsdorp,  
39 2010; O'Brien, Dafforn, Chariton, Johnston, & Mayer-Pinto, 2019). Combined management strategies such  
40 as reduced fishing (Couce, Schratzberger, & Engelhard, 2020), designation of marine protected areas  
41 (MPA), and placing artificial hard substrates such as off-shore wind parks are suggested to facilitate  
42 rehabilitation of the North Sea ecosystem (Claudet, 2018; Degraer et al., 2020; Didderen, Lengkeek,  
43 Bergsma, & Dongen, 2019; Kamermans, van Duren, & Kleissen, 2018). To understand how North Sea fish  
44 population dynamics are affected by these strategies, development and validation of methods that map  
45 fish population diversity and density is crucial. Conventional marine fish biomonitoring practices largely  
46 rely on destructive methods that involve netting and trapping (Daan, Gislason, Pope, & Rice, 2005; Reiss  
47 et al., 2010). These methods are costly, time-consuming and require expert taxonomic visual identification  
48 skills (Mateos-Rivera et al., 2020; Teletchea, 2009). In addition, conventional methods have limited  
49 sampling efficiencies and may be disruptive to the environment (Eggleton, Depestele, Kenny, Bolam, &  
50 Garcia, 2018). Thus, it is crucial to develop precise and non-invasive biomonitoring solutions that are time  
51 and cost efficient (Goodwin et al., 2017).

52

53 Environmental DNA (eDNA) based fish species identification has gained substantial attention in the last  
54 decade, as it can detect the presence of fish species based on a small amount of DNA present in e.g. 1  
55 liter of seawater. It has been shown to be highly sensitive for non-indigenous species detection (Ficetola,  
56 Miaud, Pompanon, & Taberlet, 2008) and identification of spawning and migration patterns (Thalinger,  
57 Wolf, Traugott, & Wanzenböck, 2019). Short read eDNA metabarcoding has become an increasingly  
58 popular tool to perform fish community assessment for identification of ecological relevant fish species

59 from an array of ecosystems (Deiner et al., 2017; Miya et al., 2015; Ruppert, Kline, & Rahman, 2019;  
60 Taberlet, Coissac, Pompanon, Brochmann, & Willerslev, 2012; Thomsen et al., 2012). Also in the North  
61 Sea, eDNA metabarcoding results from a sampling effort close to fykes showed to be comparable to the  
62 fyke catches themselves. (Bleijswijk et al., 2020).

63

64 The standardization of eDNA metabarcoding as monitoring strategy is still under development. Species-  
65 related differences occur in e.g. degree of skin cell shedding, ambient dependent (seasonal) degradation  
66 rates and unknown dilution factors depending on currents make quantification of the results challenging  
67 (Beng & Corlett, 2020; Lacoursière-Roussel, Côté, Leclerc, & Bernatchez, 2016; Sassoubre, Yamahara,  
68 Gardner, Block, & Boehm, 2016; Seymour et al., 2018). The sample preparation and metabarcoding  
69 technique and workflow will determine the quality of the results and thus the species detection quality and  
70 possible biases (Beng & Corlett, 2020; van der Loos & Nijland, 2020). Important steps in the protocol  
71 include decisions about methods of sampling and DNA extraction (Bessey et al., 2020; Hunter, Ferrante,  
72 Meigs-Friend, & Ulmer, 2019), primer and PCR settings (Doi et al., 2019; Sard et al., 2019; Zhang, Zhao,  
73 & Yao, 2020), sequencing technology (Egeter et al., 2020; Singer, Fahner, Barnes, McCarthy, & Hajibabaei,  
74 2019; Truelove, Andruszkiewicz, & Block, 2019), post sequencing data handling (Santos, van Aerle,  
75 Barrientos, & Martinez-Urtaza, 2020) and reference databases used (Hestetun et al., 2020; McGee,  
76 Robinson, & Hajibabaei, 2019).

77

78 Especially choice of primer and targeted DNA region are crucial for successful fish detection with eDNA  
79 (Beng & Corlett, 2020). Several universal fish primers are available that mostly target regions of the  
80 mitochondrial genome as there is a high copy number of this genome per cell (Schon, 2000). The most  
81 used primers target different short regions from 100 to 500 nucleotides of the 12S rRNA (Miya et al., 2015;  
82 Riaz et al., 2011; Taberlet, Bonin, Zinger, & Coissac, 2018) 16S rRNA (DiBattista et al., 2017; Evans et  
83 al., 2016), cytochrome B (Thomsen et al., 2012) and COI (Balasingham, Walter, Mandrak, & Heath, 2018)  
84 gene. Although primers targeting short 12S regions are the most commonly used and considered as a  
85 standard (Shu, Ludwig, & Peng, 2020), longer target amplicon size yield higher taxonomic resolution  
86 (Zhang et al., 2020). Also the use of multiple primer sets are suggested to increase taxonomic resolution  
87 (Evans et al., 2016; Miya et al., 2015; Zhang et al., 2020) and has been shown to increase species level  
88 detectability in lakes (Sard et al., 2019). A method to relatively increase the presence of less abundant  
89 taxa is applying oligo blocking primers to reduce the amount of unwanted DNA in samples such as human  
90 DNA or DNA from very abundant taxa (Liles et al. 2003; Vestheim & Jarman, 2008 ). In addition, using  
91 longer reads and multiple marker sets can enhance the necessary species resolution and specificity

92 although it remains unclear how the use of a blocking primer may affect marine vertebrate species  
93 detection.

94

95 Long read sequence analysis with commonly used Illumina platforms is not possible due to its abilities to  
96 sequence with high accuracy but with a read length maximum of 500bp (Tan, Opitz, Schlapbach, &  
97 Rehrauer, 2019). Fortunately, third generation sequencing as available from Oxford Nanopore Technologies  
98 (ONT) and Pacific Biosciences enables the generation of ultra-long sequences (Bleidorn, 2016). This can  
99 be used for eDNA studies that are based on primers targeting longer regions, covering several  
100 mitochondrial marker genes. Such approach showed successful in microbial metabarcoding studies, which  
101 considerably increased taxonomic resolution up to species level (Johnson et al., 2019; Shin et al., 2016).  
102 Historically, the main limitation of nanopore sequencing was the relatively large error rate of 5 to 10%  
103 (Jain et al., 2015). This error rate can be overcome with bioinformatics tools to generate reliable consensus  
104 sequences and thus increase sequence accuracy (Baloğlu et al., 2020; Carradec et al., 2020; Egeter et al.,  
105 2020). To our knowledge, a bioinformatics pipeline is not yet available to generate such consensus  
106 sequences from raw sequence data in multiplexed metabarcoding experiments. Such a pipeline would  
107 greatly facilitate the development of long read metabarcoding in marine molecular biomonitoring.

108

109 This study aims to investigate the possibilities of long read metabarcoding of eDNA with a newly designed  
110 fish specific primer pair targeting a 2kb amplicon containing both the 12S and 16S mitochondrial rRNA  
111 genes, using Oxford nanopore MinION sequencing. To increase species identification accuracy, we  
112 developed a sequence data processing pipeline. The identification resolution of the primers were tested *in*  
113 *silico* on several genetically similar species from the genus *Ammodytes* (sandeels). eDNA sampled from a  
114 large marine zoo aquarium was used to analyse the accuracy of species identification together with  
115 technical evaluations such as the use of replicates to better understand the species detection possibilities  
116 of the amplicon. Further, we assessed the effectiveness of a human-specific oligo blocking primer to reduce  
117 the influence of human DNA in the sample on target species detection. Finally, we applied our newly  
118 developed long read metabarcoding approach to field samples collected at different locations and  
119 timepoints in the North Sea.

120

## 121 Materials and Methods

### 122 Sample collection

123 Samples were collected on three separate sampling sites with varying sampling approaches; the Ocean  
124 aquarium of Royal Burgers' Zoo, Arnhem, the Netherlands; around North Sea shipwrecks; and in the North  
125 Sea on a transect from Gemini Wind Park to Borkum Reef Grounds (figure 1).

126 For eDNA samples from the Ocean aquarium in Burgers' Zoo, 2L water samples were collected just under  
127 the water surface using a 1L plastic container pre-sterilized with bleach. After filtering, filters were cut in  
128 quarters to serve as filter replicates (figure 1a). Demineralized tap water from Burgers' Zoo was also  
129 filtered to serve as negative control. The Ocean aquarium has a volume of 3000 m<sup>3</sup> artificial seawater and  
130 represents the edge of a tropical coral reef with only fish, in total 31 species varying in size from ~ 5 cm  
131 to 2.5 m.-The water temperature is kept at 24.5-26.0°C, the salinity at 33.0 ‰ and the pH at 8.00-8.10.  
132 In the North Sea, samples were collected around three different ship wrecks while SCUBA diving: wreck 1  
133 (55.1821 N, 03.4446 E using the WGS84 reference system), wreck 2 (55.2609, 03.5117) and wreck 3  
134 (55.0774, 02.5087). At each sample location, three replicates of approximately 2L of seawater were taken  
135 by pumping (figure 1b, [dx.doi.org/10.17504/protocols.io.6yfhftn](https://doi.org/10.17504/protocols.io.6yfhftn)). Tap water was used as negative control.  
136 From Borkum Reef Grounds/Gemini Wind Park, samples were collected from inside Gemini Wind Park  
137 (54.0109, 6.0781), halfway Gemini Wind Park and the Borkum Reef Grounds on sandy substrate (53.8645,  
138 6.2145) (Sandy bottom) and at Borkum Reef Grounds (53.7016, 6.3467). All samples were taken at slack  
139 tide during neap tides. Three 1L replicates were collected at each location by sampling seawater using 2.5  
140 L Niskin bottles at 0.5-1m above the seafloor on 2, 17 and 31 July 2020 (figure 1c). Demi water was used  
141 as negative control.

142 All samples were immediately filtered using Thermo Scientific Nalgene Rapid-Flow sterile disposable Filter  
143 Units CN (Cellulose nitrate) with a pore size of 0.8µm. Filters were then individually placed in 2mL screwcap  
144 Eppendorf tubes. The tubes were prefilled with 400µL tissue lysis buffer (ATL, Qiagen, USA) when sampled  
145 in Burgers' Zoo and 400µL Zymo DNA/RNA shield (Zymo, USA) preservative when sampled at the North  
146 Sea. Samples were immediately stored at -20°C for a maximum of one month before further processing.

147

### 148 Primer design

149 Primer design is based on the adjacent ribosomal genes 12S and 16S of the mitochondrial genome of bony  
150 and cartilaginous fish present in either the North Sea or the Ocean aquarium of Royal Burgers' Zoo,

151 Arnhem, the Netherlands. Primers were designed *in silico* in Geneious prime 2019.0.4 (Kearse et al., 2012)  
152 and based on the in NCBI available mitochondrial genomes of the target species. Blocking primers were  
153 designed for *Homo sapiens*. The complete 12S and 16S region was extracted from all available  
154 mitochondrial fish genomes. A consensus sequence for each species was constructed when multiple  
155 genomes were available from the same species using default settings of the MAFFT alignment tool (v7.450,  
156 Katoh & Standley, 2013) incorporated in Geneious. Consensus sequences of all species were aligned and  
157 primers were designed manually by locating regions with low genetic variation between target species.  
158 This resulted in a long read universal fish primer pair (table 1) targeting a 2kb fragment from 450bp  
159 downstream the 12S rRNA gene in forward direction and 300bp upstream the 16S rRNA gene in reverse  
160 direction (figure 2a). The 5' ends of the primers were extended with an ONT tag to allow for direct PCR  
161 based sample barcoding in downstream library preparation.

162 The additional *Homo sapiens* specific oligo blocking primer is designed based on the alignment with the  
163 universal forward primer and extended with a human specific sequence (table 1). The 3' end of the blocking  
164 primer was extended with a phosphoramidite C3 spacer to chemically prevent polymerase activity. Primers  
165 were synthesized by Integrated DNA Technologies and purified by standard desalting only (Integrated DNA  
166 technologies Inc., USA).

167

#### 168 DNA extraction

169 To pre-process the samples, Proteinase K was added to the samples, together with silica (Biospec products,  
170 USA) to facilitate crushing of the filters with a pestle to promote DNA extraction. Further DNA extraction  
171 was performed using a DNeasy Blood and Tissue extraction kit (Qiagen, USA) in low bind Eppendorf tubes.  
172 DNA concentrations were measured using a Qubit 2.0 Fluorometer (Invitrogen, USA). DNA from filters  
173 from the two North Sea datasets were extracted using the Quick-DNA miniprep kit (Zymo, USA) according  
174 to the manufacturer's instructions. Details of both protocols are also given at [protocols.io](https://protocols.io)  
175 ([dx.doi.org/10.17504/protocols.io.6yfhftn](https://doi.org/10.17504/protocols.io.6yfhftn)).

176

#### 177 Amplification

178 For PCR amplification of the target sequences of the samples from the Ocean aquarium, 10µL 2x Phire  
179 Tissue Direct PCR Master Mix (ThermoFisher Scientific, USA) was used. To the master mix, 0.4µL of each  
180 primer (10mM), 0.5µL template and nuclease free water was added to a total volume of 20µL. To reduce  
181 the effect of stochastic heterogeneity in PCR amplification, samples were amplified using 4 separate PCR

182 replicates, except for filter 4, from which only 1 replicate could be obtained after amplification with PCR.  
183 When applied, blocking primer was added in a 5:1 ratio to the universal forward primer. A thermocycler  
184 was used with the following settings: initial denaturation at 98°C for 180s, 35 cycles of 98°C for 8s, 59.6°C  
185 for 8s, 72°C for 30s followed by a final extension at 72°C for 180s. Prior to sequencing, quality of the  
186 amplicons was checked on gel. A sample was also amplified at the Ocean aquarium field site using miniPCR  
187 8 thermal cycler (miniPCR bio, UK) and 4 replicates were pooled to be able to skip downstream barcoding  
188 PCR. Samples were purified using a pre-prepared solution of Sera-Mag™ Magnetic SpeedBeads™ (Sigma-  
189 Aldrich, USA). Beads were prepared according to the original protocol (Deangelis, Wang, & Hawkins, 1995).  
190 Amplicon replicates were not pooled and consequently sequenced separately. For the North Sea samples,  
191 three PCR replicates were used in combination with a hot start and an annealing temperature of 59°C for  
192 8s. In addition, field samples from Borkum Reef Grounds transect were amplified with 35-45 cycles,  
193 depending on sample (S2) to increase amplification yield. PCR replicates were pooled prior to purification  
194 with beads.

195

#### 196 Nanopore sequencing

197 Amplicon sequence library preparation was performed using the SQK-LSK109 kit and PCR barcoding kit 96  
198 (PCB-096) (Oxford Nanopore Technologies Ltd., UK), according to the manufacturer's instructions, with  
199 the following adaptations: barcoding PCR was performed in a total volume of 15µL containing 0.3µL PCR  
200 barcode primer and 10-50ng amplicon. The applied barcode PCR program was as follows: initial  
201 denaturation at 95°C for 180s, 15 cycles of 95°C for 15s, 62°C for 15s, 65°C for 90s, followed by a final  
202 extension at 65°C for 180s.

203 After the barcoding PCR, sample concentration was estimated using the Qubit HS kit on the non-purified  
204 barcoded PCR products, and samples were pooled in equimolar ratios. The pooled amplicon sequence  
205 library was cleaned using magnetic beads, washed once with 70% ethanol and once with a mixture of Long  
206 Fragment Buffer (LFB) and Short Fragment Buffer (SFB) (2:1) to enrich for the 2kb target size fragments.  
207 During final clean-up, the library was again washed in a mixture of LFB and SFB in a ratio of 2:1. A  
208 maximum of 100ng DNA was loaded on a primed flow cell to prevent overloading of the flow cell. If  
209 necessary, the flow cell was refuelled using a mixture of Sequencing Buffer (SQB) and nuclease free water  
210 (1:1). Sequencing was performed until an estimated average sequencing depth of 30k reads per barcode  
211 was achieved. Base-calling was performed using Guppy (Version 4.2.2, Oxford Nanopore Technologies  
212 Ltd., UK) in high accuracy (HAC) mode. For the North Sea field samples, the estimated sequencing depth

213 differed, as 25-50k reads were obtained per barcode for From Borkum Reef Grounds/Gemini Wind Park  
214 samples and 70-100K per barcode for the shipwreck samples.

215

## 216 Bioinformatics

217 The bioinformatic analysis was performed with our new pipeline called Decona (v0.1.2)  
218 (<https://github.com/Saskia-Oosterbroek/decona>). Decona was used to demultiplex, filter read length  
219 (1800-2200 bases) and quality (q 10), cluster (at 80%) and build Medaka consensus sequences from each  
220 cluster larger than 100 sequences (decona -d -l 1800 -m 2200 -q 10 -c 0.8 -n 100 -M). Decona  
221 demultiplexes different barcodes with Qcat v1.1.0 (2018 Oxford Nanopore Technologies Ltd., UK).  
222 Furthermore, Decona uses Nanofilt v2.3.0 to filter raw fast reads on quality and read length (De Coster,  
223 D’Hert, Schultz, Cruys, & Van Broeckhoven, 2018). It then uses CD-hit v4.8.1, a program clustering reads  
224 based on short words rather than sequence alignment, to cluster the reads based on a set percentage of  
225 similarity (W. Li, Jaroszewski, & Godzik, 2002). The clustered reads are subsequently aligned using  
226 Minimap2 v2.17 (H. Li, 2018). Based on these alignments, Racon v1.4.13 is used to build the initial draft  
227 consensus sequence of each cluster (Vaser, Sović, Nagarajan, & Šikić, 2017) which is then polished by  
228 Medaka v1.1.2 (2018 Oxford Nanopore Technologies Ltd., UK). For read identification Decona is integrated  
229 with NCBI’s BLAST+ command line tool.

230 For taxonomic identification, an in-house compiled reference database was used based on sequences  
231 available in the NCBI database. Separate databases were built to analyse the datasets of the Ocean  
232 aquarium (last search April 2018) and for the North Sea (last search April 2021) datasets. When the whole  
233 mitochondrial genome was not available, available sequences of the 12S and/or the 16S from the species  
234 were added to the databases. To validate correct species identification, closely related and tropical fish  
235 species that do not occur in the Ocean aquarium were also added to the respective in-house databases, as  
236 were frequently occurring contaminants.

237 Species identification of the 2kb reads were obtained with the taxonomic identifier Centrifuge v1.0.4 (Kim,  
238 Song, Breitwieser, & Salzberg, 2016) with a minimal alignment length of 200 nucleotides and using only 1  
239 primary assignment for each consensus sequences. If a consensus sequence was aligned with the same  
240 quality/score to two or more species, sequences were assigned to genus level. Consensus reads that could  
241 not be identified on species level, were labelled NO\_ID. In addition, consensus sequences labelled with  
242 NO\_ID were later verified using BLASTn with the online database of NCBI. No hits with >99% identity were  
243 missed but if there was a hit with lower sequence identity (>94%), the sequence was assigned at genus



244 level. Initially, the Decona build-in function BLASTn was used for taxonomic identification and to assess  
245 the accuracy of the amplicons. However, due to the use of the longer 2kb amplicon, Centrifuge considerably  
246 outperformed BLAST in terms of overall correct species identification (S4) and was therefore used for  
247 taxonomic identification.

248

## 249 Data analysis

250 The Centrifuge output including the number of clusters and sequences per identification was processed in  
251 R studio v1.1.463. Sequence data were loaded as data frame in R using the packages taxize v0.9.96  
252 (Chamberlain & Szöcs, 2013) and phyloseq v1.30.0 (McMurdie & Holmes, 2013). Prior to analysis,  
253 sequences from *Homo*, *Ovis*, *Gallus* and *Bos* genera were removed from the dataset when applicable. In  
254 the dataset of the Borkum Reef Grounds, samples that yielded one (or less) successful PCR amplification  
255 replicate, were removed from the dataset. This resulted in the removal of several samples from 31<sup>st</sup> of July  
256 upon which was decided that all datapoints of that day were removed. Non-parametrical Wilcoxon rank  
257 test was performed to analyse the statistical effect of blocking primer. Non-metric multidimensional scaling  
258 ('jaccard') was performed in combination with PERMANOVA to analyse the effect of location in field samples.

259

## 260 Results & Discussion

### 261 Designed 2kb primers cover sufficient length to distinguish between closely related *Ammodytes* species

262 Prior to utilizing, the designed primers were tested *in silico* using the available full mitogenomes of North  
263 Sea and tropical marine fish species (data not shown) which indicated that both primers could anneal to  
264 both the North Sea and tropical fish and further vertebrate mitogenomic sequences. *In silico* comparison  
265 of the region covered by the 2kb primer of this study (12S-16S\_ONT) and other commonly used 12S and  
266 16S primers (Zhang et al., 2020), shows that the regions obtained from most of the previously used primer  
267 pairs are also obtained by the primer pair from this study (figure 2a). Exceptions are the commonly used  
268 Mifish and teleo2 primer pairs that both anneal to a region upstream of the forward primer binding site of  
269 this study. Alignment of 5 *Ammodytes* (sandeel) species with low genetic variability, *A. marinus*, *A.*  
270 *tobianus*, *A. hexapterus*, *A. personatus*, *A. dubius* and *Hyperoplus lanceolatus* shows a species specific  
271 pattern of single nucleotide polymorphisms (SNPs). Alignment of the previously used primer pairs shows  
272 that a limited amount of SNPs can be detected ranging from 0 to 5 between all species (figure 2b). In

273 contrast, when our newly designed primer pair is used, the SNPs from all primer pairs together can be  
274 detected while also detecting SNPs upstream of the 16S rRNA gene (figure 2b). In the region of the 16S  
275 rRNA gene with a relatively high amount of variability and high primer coverage, most of the *Ammodytes*  
276 species only have one or two unique SNPs, which is not sufficient for identification on species level (figure  
277 2c). This *in silico* comparison therefore shows that enhanced identification resolution on species level can  
278 be obtained when using long read metabarcoding.

279

## 280 Accuracy and detection sensitivity testing using the Ocean aquarium

### 281 Enhanced sequence accuracy up to 100% using Decona

282 Samples collected in the Ocean aquarium yielded 599299 reads that were assigned to 247 different  
283 consensus sequences (Doorenspleet, K., Jansen, L., Oosterbroek S., Nijland, 2021). Barcode distribution  
284 was between 5-20k reads except for barcode 35 (sample processed at the aquarium site) which contained  
285 286108 reads (S1). When the consensus sequences were identified with BLASn, based on complete query  
286 coverage, more than 35% of these sequences could be correctly identified based on a percentage identity  
287 of 99.9-100%. A total of 71.6% of the consensus sequences could be correctly identified based on a  
288 percentage identity of 99.5% or higher. This demonstrates the potential of the Decona pipeline to  
289 successfully increase identification accuracy of nanopore sequence data with up to 10% points compared  
290 to the raw read accuracy. This accuracy is comparable to what is currently expected from highly accurate  
291 Illumina reads (Caporaso et al., 2011). To our knowledge a combination of bioinformatics tools in one line  
292 of code have not yet been described for nanopore based sequence read processing of metabarcoding data.  
293 The script and associated tools are available as the pipeline Decona ([https://github.com/saskia-](https://github.com/saskia-oosterbroek/decona)  
294 [oosterbroek/decona](https://github.com/saskia-oosterbroek/decona)). Decona is written in such way that only one line of code suffices to correctly run the  
295 pipeline. As such, data processing also becomes possible for scientists with limited experience in the  
296 command line. The bioinformatics tools integrated in Decona are well established programs widely used in  
297 genomics and transcriptomic studies (Huang, Niu, Gao, Fu, & Li, 2010; H. Li, 2018). Currently, there is  
298 limited automated bioinformatics processing reported in nanopore based studies, especially for  
299 metabarcoding (Santos et al., 2020). For example, tools as CD-Hit (Huang et al., 2010) have previously  
300 been used in nanopore studies for clustering (Voorhuijzen-Harink et al., 2019) and consensus building of  
301 fish amplicons. Reference based polishing was successfully applied when identifying benthic organisms on  
302 autonomous reef monitoring structures (Jin et al., 2020) using *minibarcode.py* (Srivathsan et al., 2018).  
303 The combination of both clustering and *de novo* alignment based polishing with racon (Vaser, Sović, et al.,

2017) and medaka (<https://nanoporetech.github.io/medaka/benchmarks.html#evaluation-across-samples-and-depths>) has been used for the correction of metagenomes in the *NANOclust* pipeline (Rodríguez-Pérez, Ciuffreda, & Flores, 2020). Decona on the other hand combines similarity based clustering based on short word tables instead of an alignment approach in combination with alignment based polishing with racon and medaka which further increase the identification accuracies.

309

#### 310 Blocking primer reduces *Homo sapiens* reads but also reduces species richness

311 The use of a blocking primer significantly ( $p= 0.0013$ ) reduced the relative read abundance of human DNA  
312 (figure 3a) from the eDNA sample. Overall, 15 species could be identified both with and without the use of  
313 blocking primer (figure 3c). However, the species *Chaetodon ulititensis* (1.5%), *Chelmon rostratus* (0.1%)  
314 and *Sufflamen chryopterum* (1.2%) were only detectable without the use of blocking primer (figure 3b).  
315 Initially, oligo blocking primers have been developed to block the amplification of otherwise dominating  
316 bacterial (Liles, Manske, Bintrim, Handelsman, & Goodman, 2003) taxa or host DNA in Antarctic krill diet  
317 studies to increase the detection of rarer reads/taxa (Vestheim & Jarman, 2008). The presence of an  
318 abundant proportion of human reads as observed in this study has previously been reported (Miya et al.,  
319 2015). Using an oligo blocking primer was effective for reduction of the amount of human sequences in  
320 this study. However, a decrease in species count was found, especially in taxa with low relative read  
321 abundance. A recent eDNA study that assessed the usage of blocking primers in combination with several  
322 fish specific short read primers, have also reported decreases in species richness (Zhang et al., 2020).  
323 Hence, the findings in our study agree with the suggestion to increase sequencing depth instead of using  
324 an oligo blocking primer to obtain the highest fish and vertebrate species richness (Zhang et al., 2020).  
325 Nevertheless, sequencing depth and time can be an important consideration, especially when sequencing  
326 budget is limited. Careful usage of an oligo blocking primer can then still be relevant for limited studies  
327 where a more general species pattern is more relevant than the complete diversity.

328

#### 329 Replication increases species detection sensitivity

330 In the Ocean aquarium dataset, four pseudo replicates are used by cutting the filters in four. After  
331 metabarcoding without using a blocking primer, the species composition and richness differed (Figure 4).  
332 Noteworthy, the species uniquely found on one of the filters; *C. rostratus* (0.4%), *Epinephelus*  
333 *flavocaeruleus* (0.6%), *Labroides dimidiatus* (0.3%), *Odonus niger* (0.4%), *Scomber scombrus* (1.5%)  
334 and *S. chryopterum* (1.7%) all represent species with low total biomass in the aquarium. Of these, findings

335 of mackerel (*S. scombrus*) likely represents the detection of the feed that is used for the sharks. Several  
336 different numbers of replicates have been used between studies ranging from no replication (Gold,  
337 Sprague, Kushner, Zerecero Marin, & Barber, 2021; Stoeckle et al., 2021), three replicates (Andruszkiewicz  
338 et al., 2017; Singer et al., 2019) to five replicates (Jeunen et al., 2019). In our study there was a  
339 considerable increase in species richness and detection of unique rare reads when using replicates. Thus,  
340 filter replication increases the detection sensitivity. This is in agreement with similar observations where  
341 the use of replication increased the detection sensitivity (Beentjes, Speksnijder, Schilthuizen, Hoogeveen,  
342 & Van Der Hoorn, 2019; Evans et al., 2017). Recently, an increase of 25% of species count was found  
343 between using one and 18 biological 1L replicates, but using only limited number of replicates already  
344 detects the optimal number of species (Macher et al., 2021). The filters extracted and amplified at the  
345 Burgers' Zoo site, showed the highest species richness. However for this sample, the sequencing depth  
346 was 10 to 40 times higher than the separate barcodes of the lab processed filter replicates. This makes  
347 direct comparison between the processing locations delicate as it cannot be determined to which extend  
348 the sequencing depth could have influenced detection of field sample unique rare species. On the other  
349 hand, sampling approach, processing and sequencing depth considerably differed from samples processed  
350 in the lab. Therefore these data also shows the robustness of the method, independent of the processing  
351 location. Nevertheless, in this study, several species remained undetected, which could be improved by  
352 using more replicates, a greater sequencing depth or a greater volume of water where possible.  
353 Accordingly, careful considerations on the sampling design both in terms of replication, sampling volume  
354 and sequencing depth are also important when conducting long read eDNA metabarcoding.

355

#### 356 Majority of species are detected by long reads

357 Of the total number of consensus sequences, 92.2% of the raw reads resembling a consensus sequence  
358 could be taxonomically identified at species or genus level. The remaining 7.8% could not be taxonomically  
359 identified with the used reference database and identification tools. However, based on individual BLASTn  
360 results of the unassigned consensus sequences 2 additional genera, *Plectorinchus* and *Glaucostegus* were  
361 identified. Of all taxonomically identified sequences, 17 genera could be identified from 23 different genera  
362 present in the Ocean aquarium (figure 5a). These 23 genera represented 31 species of which 18 species  
363 could be identified (figure 5b). Specifically, the reads obtained with this long read metabarcoding method  
364 identified more than 58% of the species and 74% of genera present in the ocean aquarium. This percentage  
365 is lower than previous single marker validation studies where 80-100% of species present in a tank could  
366 be identified (Evans et al., 2017; Kelly, Port, Yamahara, & Crowder, 2014). It must be noted however that

367 in these studies often a low (5-10) number of fish species per tank is used. A validation experiment of a  
368 complex aquarium with 100+ species using multiple markers, demonstrated a maximum of 50%  
369 identification on species level and 80% on genus level when using 12S, 16S and COI together (Morey,  
370 Bartley, & Hanner, 2020). Results presented here are better comparable in terms of species complexity of  
371 the aquarium but especially the technical approach of using multiple markers. This, because *in silico*  
372 validation of the primer pair of this study shows that this fragment covers both the target regions of most  
373 of the commonly used 12S and 16S primers for fish eDNA studies and large regions of the 12S and 16S  
374 rRNA gene that are usually not targeted. *In silico* validation also shows that the 2kb fragment is better in  
375 distinguishing between closely related species of the *Ammodytes* genus than using a single 12S or 16S  
376 marker. We therefore suggest that long read metabarcoding targeting this 2kb fragment can be as effective  
377 if not more effective as using a multi marker approach to detect complex fish communities. Moreover,  
378 using multiple markers is more effective than single marker approaches but considerably increases the  
379 processing costs. Thus, an additional advantage of using a long read approach with a single primer pair to  
380 cover multiple genetic regions is increased species detection sensitivity without increasing laboratory costs.

381

#### 382 Incomplete reference database still hampers correct identification of long reads

383 Of the 5 genera that were not detected in this experiment, 3 genera (*Bodianus*, *Chrysiptera* and  
384 *Pomacentrus*) were only represented in the reference database with the 16S reference on genus level, and  
385 from 2 genera (*Ctenochaetus* and *Siganus*) the full mitogenome was available (Table 2). Although the full  
386 mitochondrial references of these genera were present in the database, these species were not detected.  
387 The species corresponding to these genera represent very small fish species, indicating that the availability  
388 of shed DNA from these relatively small fish could have been too limited for identification. This is in line  
389 with inconsistent detection of rare taxa between filters in previous reports (Evans et al., 2017; Kelly et al.,  
390 2014; Morey et al., 2020). Species names could be assigned based on both complete reference  
391 mitogenome or partial 12S or 16S references (Table 2). Of the undetected species *Acanthurus tennentii*,  
392 *Myripristis jacobus*, *Plectorhinchus obscurus* and *Chrysiptera parasema* no reference was available, which  
393 makes definitive identification of these species almost impossible. Instead of the unidentified species  
394 *Abudefduf sexfasciatus* and *Myripristis murdjan*, the species *Abudefduf vaigiensis* and *Myripristis berndti*  
395 were identified. For these two identified species the full mitogenome was present whereas for the  
396 undetected species, only the 16S reference was available. For primers targeting long DNA regions, a limited  
397 reference database can be the limiting factor as several parts of the target sequence might not (yet) be  
398 stored in the reference database. This study shows that even with only a single marker available in the

399 reference database, identification is still possible. However, a complete reference of the full length amplified  
400 region remains preferred as this will give more certainty on correct identification, especially of closely  
401 related species as this reduces the possibility of false positives.

402

## 403 Biodiversity assessment of North Sea fish from different locations

### 404 Long read eDNA metabarcoding detects ship wreck specific spatial variation in species compositions

405 From 9 different filtered water samples from 3 different shipwrecks in the Dutch part of the North Sea, a  
406 total of 262732 reads were analyzed (Doorenspleet, K., Jansen, L., Oosterbroek S., Nijland, 2021), with a  
407 barcode distribution between 5-20k reads (S1). A total of 79 consensus sequences were identified, which  
408 after correction indicated 21 species. A significant difference in beta-diversity (jaccard) between the 3  
409 locations was found ( $p= 0.002$ ) (figure 6a), which resulted in clustering of water sample replicates per ship  
410 wreck (figure 6b). Despite the similarity between replicates, some species only occurred in 1 of the 3 filter  
411 replicates on all locations. For example, the species scaldfish *Arnoglossus laterna*, solenette *Buglossidium*  
412 *luteum*, harbour porpoise *Phocoena phocoena* and plaice *Pleuronectes platessa* from ship wreck 1 only  
413 occurred in replicate 2, while the species sprat *Sprattus sprattus* and *S. scombrus* only occurred in replicate  
414 3. As observed with the experiment with the ocean aquarium and earlier findings (Beentjes et al., 2019;  
415 Evans et al., 2017; Macher et al., 2021) these findings confirm that using multiple sample and filter  
416 replicates to increase the detected species richness of a location. From ship wreck 1 the composition  
417 according to the 3 samples mainly exists of grey gurnard *Eutrigla gurnardus*, dab *Limanda limanda* and  
418 bull trout *Myoxocephalus scorpius*. Unique for this shipwreck is the occurrence of sardine *Sardina*  
419 *pilchardus*. Around wreck 2 *E. gurnardus* is commonly found, and also sand goby *Pomatoschistus minutus*  
420 and plaice *Pleuronectes platessa* are common there. Turbot *Scophthalmus maximus*, *P. minutus* and  
421 common dragonet *Callionymus lyra* only were found at this ship wreck. The identifications from ship wreck  
422 3 are mainly dominated by lesser sandeel *Ammodytes marinus* and to a lower extend in terms of read  
423 count per sample, *L. limanda* and *M. scorpius*. Clearly unique species composition profiles could be  
424 indicated for the 3 different shipwrecks, and the large number of detected fish species is a good basis for  
425 defining the ecological profile. Hence, the designed primer pair is universal enough to both target tropical  
426 and North Sea fish and elasmobranch species. Interestingly, in the samples from shipwreck 1, a moderate  
427 amount of *P. phocoena*, sequences was found. Although the 2kb primer set was designed on and for bony  
428 and cartilaginous fish, the detection of harbour porpoise in our field samples suggest the applicability of  
429 the primer pair for vertebrate species. Ecologically, detection of *P. phocoena* suggest the relatively high

430 productivity and abundance of fish in this area, on which harbor porpoise feed. Although it is unlikely that  
431 this method has captured the entire fish and marine vertebrate biodiversity, it is still sensitive enough to  
432 find relevant spatial differences between sampling sites. Especially using location specific sampling  
433 methods (e.g. ship wreck sampling) gives a general overview of the vertebrate richness on a local scale  
434 and give insight into visiting species such as the harbor porpoise which is likely to be left undetected with  
435 other methods.

436

437 [Long read eDNA metabarcoding detects variation in species composition in natural/artificial reef.](#)

438 Overall, eDNA metabarcoding of 18 filtered water samples from 3 locations sampled at two time points at  
439 the transect from Borkum Reef Grounds to Gemini Wind Park resulted in 913119 sequences (Doorenspleet,  
440 K., Jansen, L., Oosterbroek S., Nijland, 2021), with a barcode distribution between 20-100k reads (S1).  
441 Based on 105 consensus sequences, 20 species could be identified. The species composition was  
442 significantly different between sampling locations and sampling dates ( $p = 0.01$ ). The species composition  
443 of Gemini Wind Park differed significantly from that on the sandy bottom ( $p=0.002$ ). The species on the  
444 Borkum Reef Grounds, on the other hand, were not significantly different from the other locations. The  
445 most abundant species at Gemini were *A. marinus*, *E. gurnardus* and *S. scombrus* (figure 7). For location  
446 Sandy bottom the most abundant species are *P. minutus* and sprat *Sprattus sprattus*, while for Borkum  
447 Reef Grounds this was *E. gurnardus*, *P. minutus* and *C. lyra*. In Gemini Wind Park, the common species  
448 composition hardly differed between the sampling dates and sequences of the thornback ray *Raja clavata*  
449 and *P. phocoena* were found. *S. pilchardus*, solenette *Buglossidium luteum*, *L. limanda*, Lozano's goby  
450 *Pomatoschistus lozanoi*, *P. phocoena* and horse mackerel *Trachurus trachurus* were not found in the July  
451 17<sup>th</sup> 2020 samples. At the Sandy bottom, more differences occurred between the 2 sampling dates. For  
452 example, the relative read abundance of *E. gurnardus* was higher on the 17<sup>th</sup> of July, while *S. pilchardus*,  
453 eel *Anguilla anguilla*, *B. luteum* and *L. limanda* were undetectable in the 17<sup>th</sup> of July samples. Also at the  
454 Borkum Reef Grounds, variation between sampling dates was found: *S. scombrus*, *S. pilchardus* and long-  
455 spined sea scorpion *Taurulus bubalis* were only detected the 2<sup>nd</sup> of July, while species *E. gurnardus*,  
456 *Arnoglossus laterna*, striped red mullet *Mullus surmuletus* and whiting *Merlangius merlangus* only on the  
457 17<sup>th</sup> of July. Despite the location-specific species found in these samples, there is considerable difference  
458 when samples are taken at different timepoints. In this study we saw clear changes in presence of pelagic  
459 fish as *S. scombrus* and *S. pilchardus* at the Borkum Reef Grounds. On the other hand in the sandy bottom,  
460 bottom dwelling fish as *P. minutus* and *B. luteum* were found on the first sampling day but not on the  
461 second day. It is enticing to suggest that these results show short term dynamics like pelagic fish

462 movement in Borkum Reef Grounds and at the sandy bottom halfway between Gemini Wind Park and  
463 Borkum Reef Grounds. However, on such short temporal scale it remains delicate to draw any meaningful  
464 ecological conclusions as eDNA metabarcoding is highly sensitive (Beng & Corlett, 2020), even when  
465 sampling in a relatively controlled environment. On the other end of the argument, temporal replication at  
466 the shorter time scale is important to consider to obtain a more complete image of the diversity in a certain  
467 area.

468

## 469 Conclusions

470 This study demonstrates and validates an eDNA metabarcoding approach using nanopore long read  
471 technology, enabling increased resolution on species level. Highlighted are increased species resolution  
472 due to the longer DNA fragments analyzed enhanced by our nanopore raw read processing pipeline Decona.  
473 We further show that limitations as insensitivity issues from incomplete reference databases remain in long  
474 read metabarcoding. Detection limitations also occur when using an oligo blocking primer. Further research  
475 should focus on direct comparisons of long read nanopore approaches with other sequencing platforms.  
476 Another interesting possibility is the use of long read metabarcoding to study spatial-temporal shifts based  
477 on the detection of eDNA fragments of different lengths. Moreover, it is essential that additions of longer  
478 reference sequences, preferably full mitogenomes, to reference databases become a high priority in marine  
479 molecular ecology, as only then long read based DNA metabarcoding and metagenomics can develop to  
480 its full potential to serve as monitoring tool.

481

## 482 Acknowledgements

483 We are grateful for the members of 'Duik the Noordzee Schoon' foundation for providing the trip to the  
484 ship wreck and assisting during the dives and sampling. We would like to thank Linda Tonk of Wageningen  
485 Marine Research, Miriam Schutter of Bureau Waardenburg and crew members of MS Vrijheid III, for  
486 providing the cruise to the Borkum Reef Grounds and Gemini Wind Park and assistance with sampling. We  
487 acknowledge GEANS, an Interreg project supported by the North Sea Programme of the European Regional  
488 Development Fund of the European Union and JIP ECO-FRIEND (RVO reference number TEWZ118017) for  
489 funding parts of this research. Especially valuable contributions are made by Aline Joustra by providing the  
490 illustrations of the experimental design (<http://www.alinesci.com/>).



491

## 492 Authors contributions

493 LJ and RN designed the experiment; LJ, PK, OB, MJ and EW were involved in sample collection and  
494 processing; LJ and RN did the laboratory work; SO, KD and RN designed the bioinformatics pipeline  
495 Decona; KD and RN conducted the data analysis; KD, LJ, SO, RN and TM interpreted the data; all authors  
496 wrote and revised the manuscript.

497

## 498 Data availability

499 All raw sequence data that support these findings are available in ENA at reference XXXXX.

500

## 501 References

- 502 Andersen, J. H., Al-Hamdani, Z., Harvey, E. T., Kallenbach, E., Murray, C., & Stock, A. (2020). Relative impacts  
503 of multiple human stressors in estuaries and coastal waters in the North Sea–Baltic Sea transition zone.  
504 *Science of the Total Environment*, 704, 135316. doi: 10.1016/j.scitotenv.2019.135316
- 505 Andruszkiewicz, E. A., Starks, H. A., Chavez, F. P., Sassoubre, L. M., Block, B. A., & Boehm, A. B. (2017).  
506 Biomonitoring of marine vertebrates in Monterey Bay using eDNA metabarcoding. *PLoS ONE*, 12(4),  
507 e0176343. doi: 10.1371/journal.pone.0176343
- 508 Balasingham, K. D., Walter, R. P., Mandrak, N. E., & Heath, D. D. (2018). Environmental DNA detection of rare  
509 and invasive fish species in two Great Lakes tributaries. *Molecular Ecology*, 27(1), 112–127. doi:  
510 10.1111/mec.14395
- 511 Baloğlu, B., Chen, Z., Elbrecht, V., Braukmann, T., MacDonald, S., & Baloglu, B. (2020). *A workflow for*  
512 *accurate metabarcoding using nanopore MinION sequencing 1*. doi: 10.1101/2020.05.21.108852
- 513 Beentjes, K. K., Speksnijder, A. G. C. L., Schilthuizen, M., Hoogeveen, M., & Van Der Hoorn, B. B. (2019). The  
514 effects of spatial and temporal replicate sampling on eDNA metabarcoding. *PeerJ*, 2019(7), e7335. doi:  
515 10.7717/peerj.7335
- 516 Beng, K. C., & Corlett, R. T. (2020). Applications of environmental DNA (eDNA) in ecology and conservation:  
517 opportunities, challenges and prospects. *Biodiversity and Conservation*, Vol. 29, pp. 2089–2121. doi:  
518 10.1007/s10531-020-01980-0
- 519 Bessey, C., Jarman, S. N., Berry, O., Olsen, Y. S., Bunce, M., Simpson, T., ... Keesing, J. (2020). Maximizing  
520 fish detection with eDNA metabarcoding. *Environmental DNA*, edn3.74. doi: 10.1002/edn3.74
- 521 Bleidorn, C. (2016, January 2). Third generation sequencing: Technology and its potential impact on  
522 evolutionary biodiversity research. *Systematics and Biodiversity*, Vol. 14, pp. 1–8. Taylor and Francis Ltd.  
523 doi: 10.1080/14772000.2015.1099575
- 524 Bleijswijk, J. D. L., Engelmann, J. C., Klunder, L., Witte, H. J., Witte, J. I., & Veer, H. W. (2020). Analysis of a  
525 coastal North Sea fish community: Comparison of aquatic environmental DNA concentrations to fish  
526 catches. *Environmental DNA*, edn3.67. doi: 10.1002/edn3.67
- 527 Caporaso, J. G., Lauber, C. L., Costello, E. K., Berg-Lyons, D., Gonzalez, A., Stombaugh, J., ... Knight, R.  
528 (2011). Moving pictures of the human microbiome. *Genome Biology*, 12(5). doi: 10.1186/gb-2011-12-5-  
529 r50

- 530 Capuzzo, E., Lynam, C. P., Barry, J., Stephens, D., Forster, R. M., Greenwood, N., ... Engelhard, G. H. (2018). A  
531 decline in primary production in the North Sea over 25 years, associated with reductions in zooplankton  
532 abundance and fish stock recruitment. *Global Change Biology*, 24(1), e352–e364. doi:  
533 10.1111/gcb.13916
- 534 Carradec, Q., Poulain, J., Boissin, E., Hume, B. C., Voolstra, C. R., Ziegler, M., ... Wincker, P. (2020). A  
535 framework for in situ molecular characterization of coral holobionts using nanopore sequencing. *BioRxiv*  
536 *Genomics*, 10(1), 1–25. doi: 10.1101/2020.05.25.071951
- 537 Chamberlain, S. A., & Szöcs, E. (2013). Taxize: Taxonomic search and retrieval in R. *F1000Research*, 2. doi:  
538 10.12688/f1000research.2-191.v2
- 539 Claudet, J. (2018). Six conditions under which MPAs might not appear effective (when they are). *ICES Journal*  
540 *of Marine Science*, 75(3), 1172–1174. doi: 10.1093/icesjms/fsx074
- 541 Couce, E., Schratzberger, M., & Engelhard, G. H. (2020). Reconstructing three decades of total international  
542 trawling effort in the North Sea. *Earth System Science Data*, 12(1), 373–386. doi: 10.5194/essd-12-373-  
543 2020
- 544 Daan, N., Gislason, H., Pope, J. G., & Rice, J. C. (2005). Changes in the North Sea fish community: Evidence of  
545 indirect effects of fishing? *ICES Journal of Marine Science*, 62(2), 177–188. doi:  
546 10.1016/j.icesjms.2004.08.020
- 547 De Coster, W., D’Hert, S., Schultz, D. T., Cruets, M., & Van Broeckhoven, C. (2018). NanoPack: Visualizing and  
548 processing long-read sequencing data. *Bioinformatics*, 34(15), 2666–2669. doi:  
549 10.1093/bioinformatics/bty149
- 550 Deangelis, M. M., Wang, D. G., & Hawkins, T. L. (1995). Solid-phase reversible immobilization for the isolation  
551 of PCR products. *Nucleic Acids Research*, 23(22), 4742–4743. doi: 10.1093/nar/23.22.4742
- 552 Degraer, S., Carey, D. A., Coolen, J. W. P., Hutchison, Z. L., Kerckhof, F., Rumes, B., & Vanaverbeke, J.  
553 (2020). OFFSHORE WIND FARM ARTIFICIAL REEFS AFFECT ECOSYSTEM STRUCTURE AND FUNCTIONING.  
554 *SPECIAL ISSUE ON UNDERSTANDING THE EFFECTS OF OFFSHORE WIND ENERGY DEVELOPMENT ON*  
555 *FISHERIES*, 33(4), 48–57. doi: 10.2307/26965749
- 556 Deiner, K., Bik, H. M., Mächler, E., Seymour, M., Lacoursière-Roussel, A., Altermatt, F., ... Bernatchez, L. (2017,  
557 November 1). Environmental DNA metabarcoding: Transforming how we survey animal and plant  
558 communities. *Molecular Ecology*, Vol. 26, pp. 5872–5895. Blackwell Publishing Ltd. doi:  
559 10.1111/mec.14350
- 560 DiBattista, J. D., Coker, D. J., Sinclair-Taylor, T. H., Stat, M., Berumen, M. L., & Bunce, M. (2017, December 1).  
561 Assessing the utility of eDNA as a tool to survey reef-fish communities in the Red Sea. *Coral Reefs*, Vol.  
562 36, pp. 1245–1252. Springer Verlag. doi: 10.1007/s00338-017-1618-1
- 563 Didden, K., Lengkeek, W., Bergsma, J. H., & Dongen, U. Van. (2019). *WWF & ARK Borkum Reef Ground*  
564 *oyster pilot*. (September).
- 565 Doi, H., Fukaya, K., Oka, S. ichiro, Sato, K., Kondoh, M., & Miya, M. (2019). Evaluation of detection  
566 probabilities at the water-filtering and initial PCR steps in environmental DNA metabarcoding using a  
567 multispecies site occupancy model. *Scientific Reports*, 9(1), 1–8. doi: 10.1038/s41598-019-40233-1
- 568 Doorenspleet, K., Jansen, L., Oosterbroek S., Nijland, R. (2021). Raw sequencing data for accurate long read  
569 metabarcoding of marine eDNA. *European Nucleotides Archives*, XXX(XX), XXX. Retrieved from XXX
- 570 Egeter, B., Veríssimo, J., Lopes-Lima, M., Chaves, C., Pinto, J., Riccardi, N., ... Fonseca, N. A. (2020). Speeding  
571 up the detection of invasive aquatic species using environmental DNA and nanopore sequencing. *BioRxiv*,  
572 326(1), 2020.06.09.142521. doi: 10.1101/2020.06.09.142521
- 573 Eggleton, J. D., Depestele, J., Kenny, A. J., Bolam, S. G., & Garcia, C. (2018). How benthic habitats and bottom  
574 trawling affect trait composition in the diet of seven demersal and benthivorous fish species in the North  
575 Sea. *Journal of Sea Research*, 142, 132–146. doi: 10.1016/j.seares.2018.09.013
- 576 Evans, N. T., Li, Y., Renshaw, M. A., Olds, B. P., Deiner, K., Turner, C. R., ... Pfrender, M. E. (2017). Fish  
577 community assessment with eDNA metabarcoding: Effects of sampling design and bioinformatic filtering.  
578 *Canadian Journal of Fisheries and Aquatic Sciences*, 74(9), 1362–1374. doi: 10.1139/cjfas-2016-0306
- 579 Evans, N. T., Olds, B. P., Renshaw, M. A., Turner, C. R., Li, Y., Jerde, C. L., ... Lodge, D. M. (2016).  
580 Quantification of mesocosm fish and amphibian species diversity via environmental DNA metabarcoding.  
581 *Molecular Ecology Resources*, 16(1), 29–41. doi: 10.1111/1755-0998.12433
- 582 Ficetola, G. F., Miaud, C., Pompanon, F., & Taberlet, P. (2008). Species detection using environmental DNA  
583 from water samples. *Biology Letters*, 4(4), 423–425. doi: 10.1098/rsbl.2008.0118

- 584 Gold, Z., Sprague, J., Kushner, D. J., Zerecero Marin, E., & Barber, P. H. (2021). eDNA metabarcoding as a  
585 biomonitoring tool for marine protected areas. *PLOS ONE*, *16*(2), e0238557. doi:  
586 10.1371/journal.pone.0238557
- 587 Goodwin, K. D., Thompson, L. R., Duarte, B., Kahlke, T., Thompson, A. R., Marques, J. C., & Caçador, I. (2017,  
588 May 9). DNA sequencing as a tool to monitor marine ecological status. *Frontiers in Marine Science*, Vol. 4.  
589 Frontiers Media S. A. doi: 10.3389/fmars.2017.00107
- 590 Hestetun, J. T., Bye-Ingebrigtsen, E., Nilsson, R. H., Glover, A. G., Johansen, P. O., & Dahlgren, T. G. (2020).  
591 Significant taxon sampling gaps in DNA databases limit the operational use of marine macrofauna  
592 metabarcoding. *Marine Biodiversity*, *50*(5), 1–9. doi: 10.1007/s12526-020-01093-5
- 593 Hofstede, R. Ter, Hiddink, J. G., & Rijnsdorp, A. D. (2010). Regional warming changes fish species richness in  
594 the eastern North Atlantic Ocean. *Marine Ecology Progress Series*, *414*(August), 1–9. doi:  
595 10.3354/meps08753
- 596 Huang, Y., Niu, B., Gao, Y., Fu, L., & Li, W. (2010). CD-HIT Suite: A web server for clustering and comparing  
597 biological sequences. *Bioinformatics*, *26*(5), 680–682. doi: 10.1093/bioinformatics/btq003
- 598 Hunter, M. E., Ferrante, J. A., Meigs-Friend, G., & Ulmer, A. (2019). Improving eDNA yield and inhibitor  
599 reduction through increased water volumes and multi-filter isolation techniques. *Scientific Reports*, *9*(1),  
600 1–9. doi: 10.1038/s41598-019-40977-w
- 601 Jain, M., Fiddes, I. T., Miga, K. H., Olsen, H. E., Paten, B., & Akeson, M. (2015). Improved data analysis for the  
602 MinION nanopore sequencer. *Nature Methods*, *12*(4), 351–356. doi: 10.1038/nmeth.3290
- 603 Jeunen, G., Knapp, M., Spencer, H. G., Lamare, M. D., Taylor, H. R., Stat, M., ... Gemmell, N. J. (2019).  
604 Environmental DNA (eDNA) metabarcoding reveals strong discrimination among diverse marine habitats  
605 connected by water movement. *Molecular Ecology Resources*, *19*(2), 426–438. doi: 10.1111/1755-  
606 0998.12982
- 607 Jin, J., Chang, M., Cheong, Y., Ip, A., Bauman, A. G., & Huang, D. (2020). MinION-in-ARMS: Nanopore  
608 Sequencing To Expedite Barcoding Of Specimen-Rich Macrofaunal Samples From Autonomous Reef 2  
609 Monitoring Structures 3 4. *BioRxiv*, 2020.03.30.009654. doi: 10.1101/2020.03.30.009654
- 610 Johnson, J. S., Spakowicz, D. J., Hong, B. Y., Petersen, L. M., Demkowicz, P., Chen, L., ... Weinstock, G. M.  
611 (2019). Evaluation of 16S rRNA gene sequencing for species and strain-level microbiome analysis. *Nature*  
612 *Communications*, *10*(1), 1–11. doi: 10.1038/s41467-019-13036-1
- 613 Kamermans, P., van Duren, L., & Kleissen, F. (2018). European flat oysters on offshore wind farms: additional  
614 locations; Opportunities for the development of European flat oyster (*Ostrea edulis*) populations on  
615 planned wind farms and additional locations in the Dutch section of the North Sea Wageningen, Wage.  
616 *Wageningen Marine Research*, *C053/18*, 33. Retrieved from internal-pdf://0719885351/Kamermans et al,  
617 2018.pdf
- 618 Katoh, K., & Standley, D. M. (2013). MAFFT Multiple Sequence Alignment Software Version 7: Improvements in  
619 Performance and Usability. *Molecular Biology and Evolution*, *30*(4), 772–780. doi:  
620 10.1093/molbev/mst010
- 621 Kearse, M., Moir, R., Wilson, A., Stones-Havas, S., Cheung, M., Sturrock, S., ... Drummond, A. (2012).  
622 Geneious Basic: An integrated and extendable desktop software platform for the organization and  
623 analysis of sequence data. *Bioinformatics*, *28*(12), 1647–1649. doi: 10.1093/bioinformatics/bts199
- 624 Kelly, R. P., Port, J. A., Yamahara, K. M., & Crowder, L. B. (2014). Using environmental DNA to census marine  
625 fishes in a large mesocosm. *PLoS ONE*, *9*(1), 86175. doi: 10.1371/journal.pone.0086175
- 626 Kim, D., Song, L., Breitwieser, F. P., & Salzberg, S. L. (2016). Centrifuge: Rapid and sensitive classification of  
627 metagenomic sequences. *Genome Research*, *26*(12), 1721–1729. doi: 10.1101/gr.210641.116
- 628 Krehenwinkel, H., Pomerantz, A., & Prost, S. (2019). Genetic biomonitoring and biodiversity assessment using  
629 portable sequencing technologies: Current uses and future directions. *Genes*, *10*(11). doi:  
630 10.3390/genes10110858
- 631 Lacoursière-Roussel, A., Côté, G., Leclerc, V., & Bernatchez, L. (2016). Quantifying relative fish abundance with  
632 eDNA: a promising tool for fisheries management. *Journal of Applied Ecology*, *53*(4), 1148–1157. doi:  
633 10.1111/1365-2664.12598
- 634 Li, H. (2018). Minimap2: Pairwise alignment for nucleotide sequences. *Bioinformatics*, *34*(18), 3094–3100. doi:  
635 10.1093/bioinformatics/bty191
- 636 Li, W., Jaroszewski, L., & Godzik, A. (2002). Tolerating some redundancy significantly speeds up clustering of  
637 large protein databases. *Bioinformatics*, *18*(1), 77–82. doi: 10.1093/bioinformatics/18.1.77

- 638 Liles, M. R., Manske, B. F., Bintrim, S. B., Handelsman, J., & Goodman, R. M. (2003). A census of rRNA genes  
639 and linked genomic sequences within a soil metagenomic library. *Applied and Environmental Microbiology*,  
640 69(5), 2684–2691. doi: 10.1128/AEM.69.5.2684-2691.2003
- 641 Macher, T.-H., Schütz, R., Arle, J., Beermann, A. J., Koschorreck, J., & Leese, F. (2021). Beyond fish eDNA  
642 metabarcoding: Field replicates disproportionately improve the detection of stream associated vertebrate  
643 species. *BioRxiv*, 2021.03.26.437227. doi: 10.1101/2021.03.26.437227
- 644 Mateos-Rivera, A., Skern-Mauritzen, R., Dahle, G., Sundby, S., Mozfar, B., Thorsen, A., ... Krafft, B. A. (2020).  
645 Comparison of visual and molecular taxonomic methods to identify ichthyoplankton in the North Sea.  
646 *Limnology and Oceanography: Methods*. doi: 10.1002/lom3.10387
- 647 McGee, K. M., Robinson, C. V., & Hajibabaei, M. (2019). Gaps in DNA-Based Biomonitoring Across the Globe.  
648 *Frontiers in Ecology and Evolution*, 7, 337. doi: 10.3389/fevo.2019.00337
- 649 McMurdie, P. J., & Holmes, S. (2013). phyloseq: An R Package for Reproducible Interactive Analysis and  
650 Graphics of Microbiome Census Data. *PLoS ONE*, 8(4), e61217. doi: 10.1371/journal.pone.0061217
- 651 Miya, M., Sato, Y., Fukunaga, T., Sado, T., Poulsen, J. Y., Sato, K., ... Iwasaki, W. (2015). MiFish, a set of  
652 universal PCR primers for metabarcoding environmental DNA from fishes: Detection of more than 230  
653 subtropical marine species. *Royal Society Open Science*, 2(7), 150088. doi: 10.1098/rsos.150088
- 654 Morey, K. C., Bartley, T. J., & Hanner, R. H. (2020). Validating environmental DNA metabarcoding for marine  
655 fishes in diverse ecosystems using a public aquarium. *Environmental DNA*, 2(3), 330–342. doi:  
656 10.1002/edn3.76
- 657 O'Brien, A. L., Dafforn, K. A., Chariton, A. A., Johnston, E. L., & Mayer-Pinto, M. (2019, September 20). After  
658 decades of stressor research in urban estuarine ecosystems the focus is still on single stressors: A  
659 systematic literature review and meta-analysis. *Science of the Total Environment*, Vol. 684, pp. 753–764.  
660 Elsevier B.V. doi: 10.1016/j.scitotenv.2019.02.131
- 661 Reiss, H., Degraer, S., Duineveld, G. C. A., Kröncke, I., Aldridge, J., Craeymeersch, J. A., ... Rees, H. L. (2010).  
662 Spatial patterns of infauna, epifauna, and demersal fish communities in the North Sea. *ICES Journal of*  
663 *Marine Science*, 67(2), 278–293. doi: 10.1093/icesjms/fsp253
- 664 Riaz, T., Shehzad, W., Viari, A., Pompanon, F., Taberlet, P., & Coissac, E. (2011). EcoPrimers: Inference of new  
665 DNA barcode markers from whole genome sequence analysis. *Nucleic Acids Research*, 39(21), e145. doi:  
666 10.1093/nar/gkr732
- 667 Rodríguez-Pérez, H., Ciuffreda, L., & Flores, C. (2020). NanoCLUST: a species-level analysis of 16S rRNA  
668 nanopore sequencing data. *Bioinformatics*. doi: 10.1093/bioinformatics/btaa900
- 669 Ruppert, K. M., Kline, R. J., & Rahman, M. S. (2019, January 1). Past, present, and future perspectives of  
670 environmental DNA (eDNA) metabarcoding: A systematic review in methods, monitoring, and applications  
671 of global eDNA. *Global Ecology and Conservation*, Vol. 17, p. e00547. Elsevier B.V. doi:  
672 10.1016/j.gecco.2019.e00547
- 673 Santos, A., van Aerle, R., Barrientos, L., & Martínez-Urtaza, J. (2020, January 1). Computational methods for  
674 16S metabarcoding studies using Nanopore sequencing data. *Computational and Structural Biotechnology*  
675 *Journal*, Vol. 18, pp. 296–305. Elsevier B.V. doi: 10.1016/j.csbj.2020.01.005
- 676 Sard, N. M., Herbst, S. J., Nathan, L., Uhrig, G., Kanefsky, J., Robinson, J. D., & Scribner, K. T. (2019).  
677 Comparison of fish detections, community diversity, and relative abundance using environmental DNA  
678 metabarcoding and traditional gears. *Environmental DNA*, 1(4), 368–384. doi: 10.1002/edn3.38
- 679 Sassoubre, L. M., Yamahara, K. M., Gardner, L. D., Block, B. A., & Boehm, A. B. (2016). Quantification of  
680 Environmental DNA (eDNA) Shedding and Decay Rates for Three Marine Fish. *Environmental Science and*  
681 *Technology*, 50(19), 10456–10464. doi: 10.1021/acs.est.6b03114
- 682 Schon, E. A. (2000, November 1). Mitochondrial genetics and disease. *Trends in Biochemical Sciences*, Vol. 25,  
683 pp. 555–560. Trends Biochem Sci. doi: 10.1016/S0968-0004(00)01688-1
- 684 Seymour, M., Durance, I., Cosby, B. J., Ransom-Jones, E., Deiner, K., Ormerod, S. J., ... Creer, S. (2018).  
685 Acidity promotes degradation of multi-species environmental DNA in lotic mesocosms. *Communications*  
686 *Biology*, 1(1). doi: 10.1038/s42003-017-0005-3
- 687 Shin, J., Lee, S., Go, M. J., Lee, S. Y., Kim, S. C., Lee, C. H., & Cho, B. K. (2016). Analysis of the mouse gut  
688 microbiome using full-length 16S rRNA amplicon sequencing. *Scientific Reports*, 6. doi:  
689 10.1038/srep29681
- 690 Shu, L., Ludwig, A., & Peng, Z. (2020, March 1). Standards for methods utilizing environmental dna for  
691 detection of fish species. *Genes*, Vol. 11, p. 296. MDPI AG. doi: 10.3390/genes11030296

- 692 Singer, G. A. C., Fahner, N. A., Barnes, J. G., McCarthy, A., & Hajibabaei, M. (2019). Comprehensive  
693 biodiversity analysis via ultra-deep patterned flow cell technology: a case study of eDNA metabarcoding  
694 seawater. *Scientific Reports*, 9(1), 1–12. doi: 10.1038/s41598-019-42455-9
- 695 Srivathsan, A., Baloğlu, B., Wang, W., Tan, W. X., Bertrand, D., Ng, A. H. Q., ... Meier, R. (2018). A MinION™-  
696 based pipeline for fast and cost-effective DNA barcoding. *Molecular Ecology Resources*, 18(5), 1035–  
697 1049. doi: 10.1111/1755-0998.12890
- 698 Stoeckle, M. Y., Adolf, J., Charlop-Powers, Z., Dunton, K. J., Hinks, G., & VanMorter, S. M. (2021). Trawl and  
699 eDNA assessment of marine fish diversity, seasonality, and relative abundance in coastal New Jersey,  
700 USA. *ICES Journal of Marine Science*, 78(1), 293–304. doi: 10.1093/icesjms/fsaa225
- 701 Taberlet, P., Bonin, A., Zinger, L., & Coissac, E. (2018). Environmental DNA: For biodiversity research and  
702 monitoring. In *Environmental DNA: For Biodiversity Research and Monitoring*. doi:  
703 10.1093/oso/9780198767220.001.0001
- 704 Taberlet, P., Coissac, E., Pompanon, F., Brochmann, C., & Willerslev, E. (2012). Towards next-generation  
705 biodiversity assessment using DNA metabarcoding. *Molecular Ecology*, 21(8), 2045–2050. doi:  
706 10.1111/j.1365-294X.2012.05470.x
- 707 Tan, G., Opitz, L., Schlapbach, R., & Rehrauer, H. (2019). Long fragments achieve lower base quality in  
708 Illumina paired-end sequencing. *Scientific Reports*, 9(1), 1–7. doi: 10.1038/s41598-019-39076-7
- 709 Teletchea, F. (2009). Molecular identification methods of fish species: Reassessment and possible applications.  
710 *Reviews in Fish Biology and Fisheries*, 19(3), 265–293. doi: 10.1007/s11160-009-9107-4
- 711 Thalinger, B., Wolf, E., Traugott, M., & Wanzenböck, J. (2019). Monitoring spawning migrations of  
712 potamodromous fish species via eDNA. *Scientific Reports*, 9(1), 1–11. doi: 10.1038/s41598-019-51398-0
- 713 Thomsen, P. F., Kielgast, J., Iversen, L. L., Møller, P. R., Rasmussen, M., & Willerslev, E. (2012). Detection of a  
714 Diverse Marine Fish Fauna Using Environmental DNA from Seawater Samples. *PLoS ONE*, 7(8). doi:  
715 10.1371/journal.pone.0041732
- 716 Truelove, N. K., Andruszkiewicz, E. A., & Block, B. A. (2019). A rapid environmental DNA method for detecting  
717 white sharks in the open ocean. *Methods in Ecology and Evolution*, 10(8), 1128–1135. doi:  
718 10.1111/2041-210X.13201
- 719 van der Loos, L. M., & Nijland, R. (2020). Biases in bulk: DNA metabarcoding of marine communities and the  
720 methodology involved. *Molecular Ecology*. Blackwell Publishing Ltd. doi: 10.1111/mec.15592
- 721 Vaser, R., Sović, I., Sović, S., Nagarajan, N., Šikić, M., & Šikić, Š. (2017). Fast and accurate de novo  
722 genome assembly from long uncorrected reads. *Genome.Cshlp.Org*. doi: 10.1101/gr.214270.116
- 723 Vaser, R., Sović, I., Nagarajan, N., & Šikić, M. (2017). Fast and accurate de novo genome assembly from long  
724 uncorrected reads. *Genome Research*, 27(5), 737–746. doi: 10.1101/gr.214270.116
- 725 Vestheim, H., & Jarman, S. N. (2008). Blocking primers to enhance PCR amplification of rare sequences in  
726 mixed samples - A case study on prey DNA in Antarctic krill stomachs. *Frontiers in Zoology*, 5(1), 1–11.  
727 doi: 10.1186/1742-9994-5-12
- 728 Voorhuijzen-Harink, M. M., Hagelaar, R., van Dijk, J. P., Prins, T. W., Kok, E. J., & Staats, M. (2019). Toward  
729 on-site food authentication using nanopore sequencing. *Food Chemistry: X*, 2, 100035. doi:  
730 10.1016/j.fochx.2019.100035
- 731 Zhang, S., Zhao, J., & Yao, M. (2020). A comprehensive and comparative evaluation of primers for  
732 metabarcoding eDNA from fish. *Methods in Ecology and Evolution*. doi: 10.1111/2041-210x.13485
- 733
- 734

735 **Table 1:** Primer sequence of the forward, reverse and oligo blocking primer.

|                       |                                                              |
|-----------------------|--------------------------------------------------------------|
| Forward primer        | Fish_12S_fw1-ONT:TTTCTGTTGGTGCTGATATTGCGGATTAGATACCCYACTATGC |
| Reverse primer        | Fish_16S_rv1-ONT: ACTTGCCTGTCGCTCTATCTTCGATTGCGCTGTTATCCCTAG |
| Oligo blocking primer | Fish_12S_Fw-BLOCK-H.s : TATGCTTAGCCCTAAACCTCAAC/3SpC3/       |

736

737

738

739

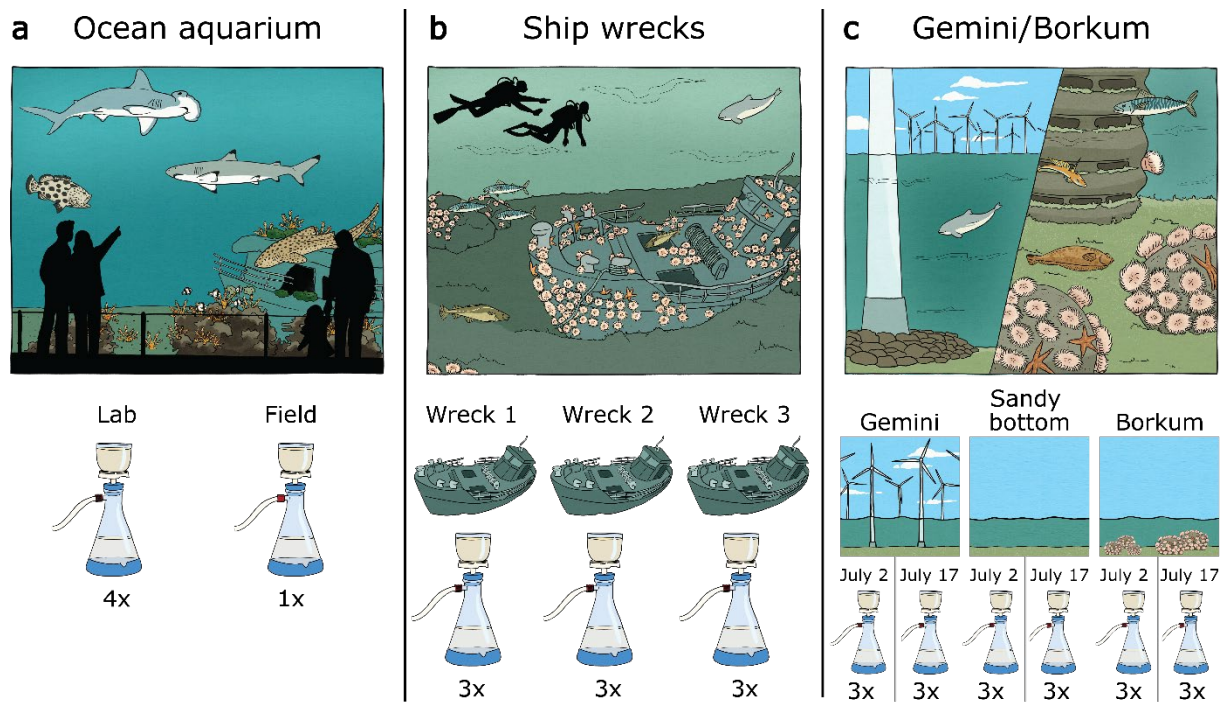

741 **Figure 1:** Sampling design of **a)** Ocean aquarium of Burgers' Zoo, the Netherlands **b)** North Sea ship  
 742 wrecks with three different ship wreck locations and **c)** Borkum/Gemini where samples were taken in  
 743 Gemini, halfway between Gemini and Borkum on a sandy bottom and Borkum reef grounds.

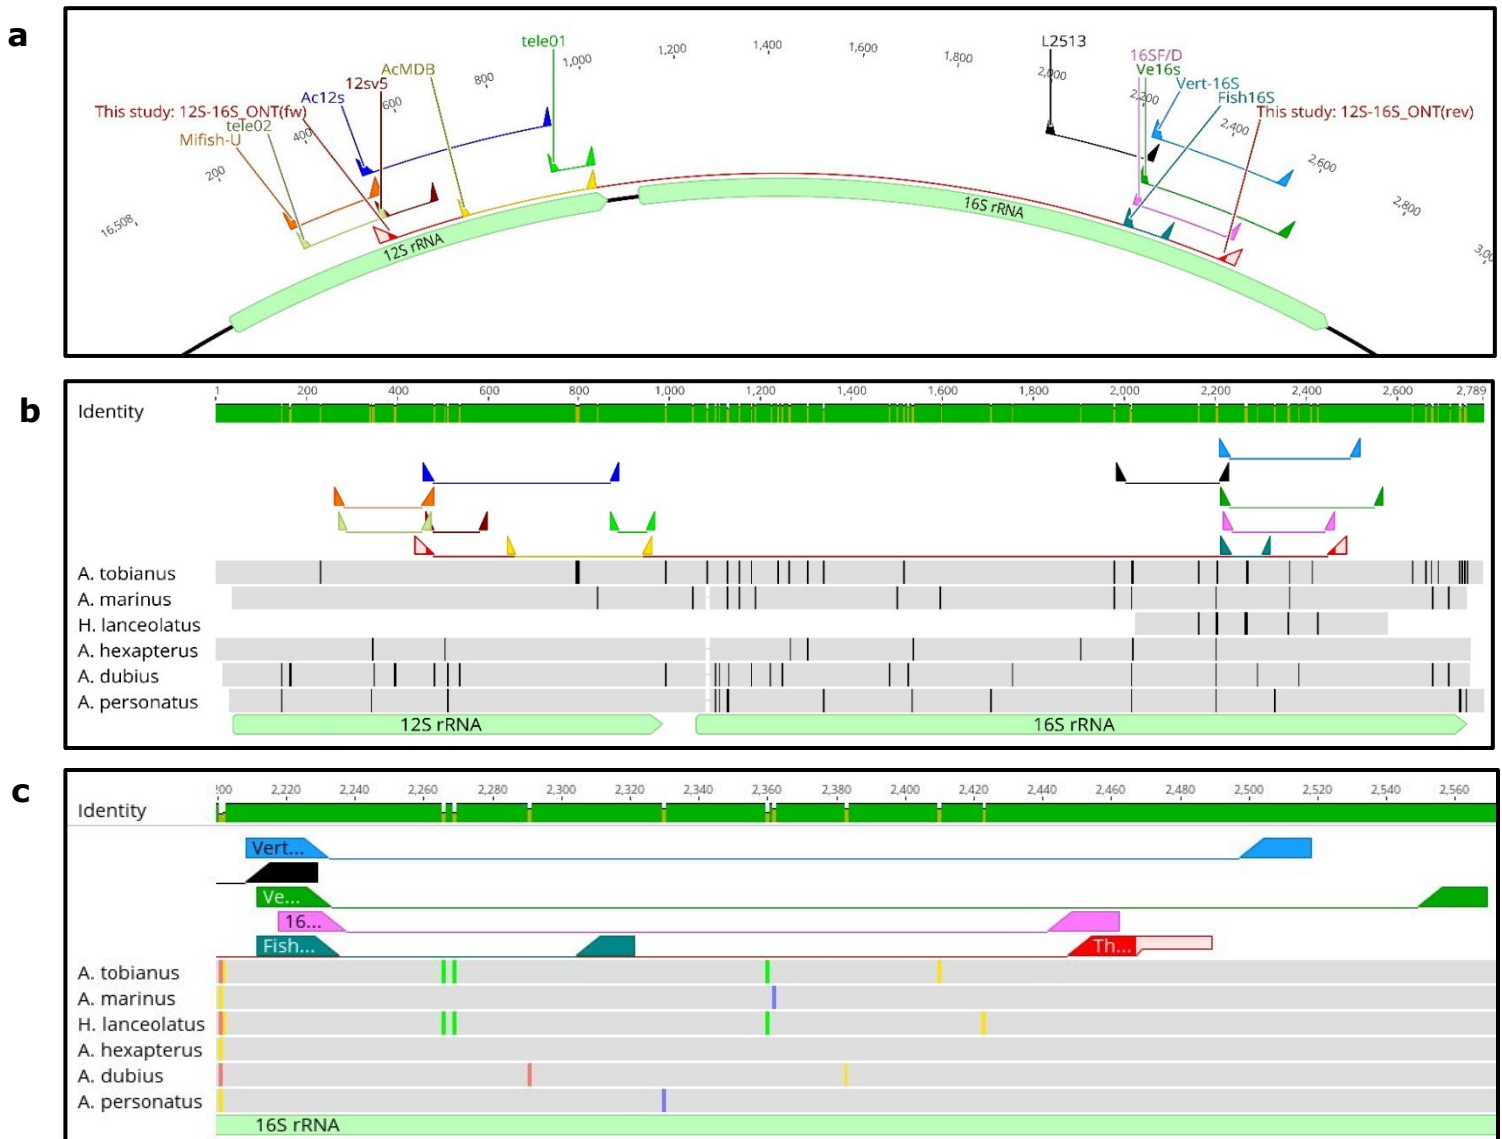

744

745 **Figure 2:** Comparison of primer binding sites of this study and other commonly used fish eDNA primers  
 746 according to Zang et al (2020). Where **a**) shows the specific primer binding locations (triangles) of the 2kb  
 747 primer pair used in this study (red) and other studies indicated in different colours. Red fill in the triangle  
 748 indicates the binding site, empty part of the triangle indicates the ONT extension. Alignment of **b**) of the  
 749 12S and 16S rRNA gene of different *Ammodytes* species that occur in both the North Sea and Atlantic  
 750 Ocean. Black stripes represent SNPs. **c**) Comparison of the region with the highest variability covered by  
 751 the highest amount of primers. Four colours represent different nucleotides (green = T, yellow = G, red =  
 752 A and blue = C).



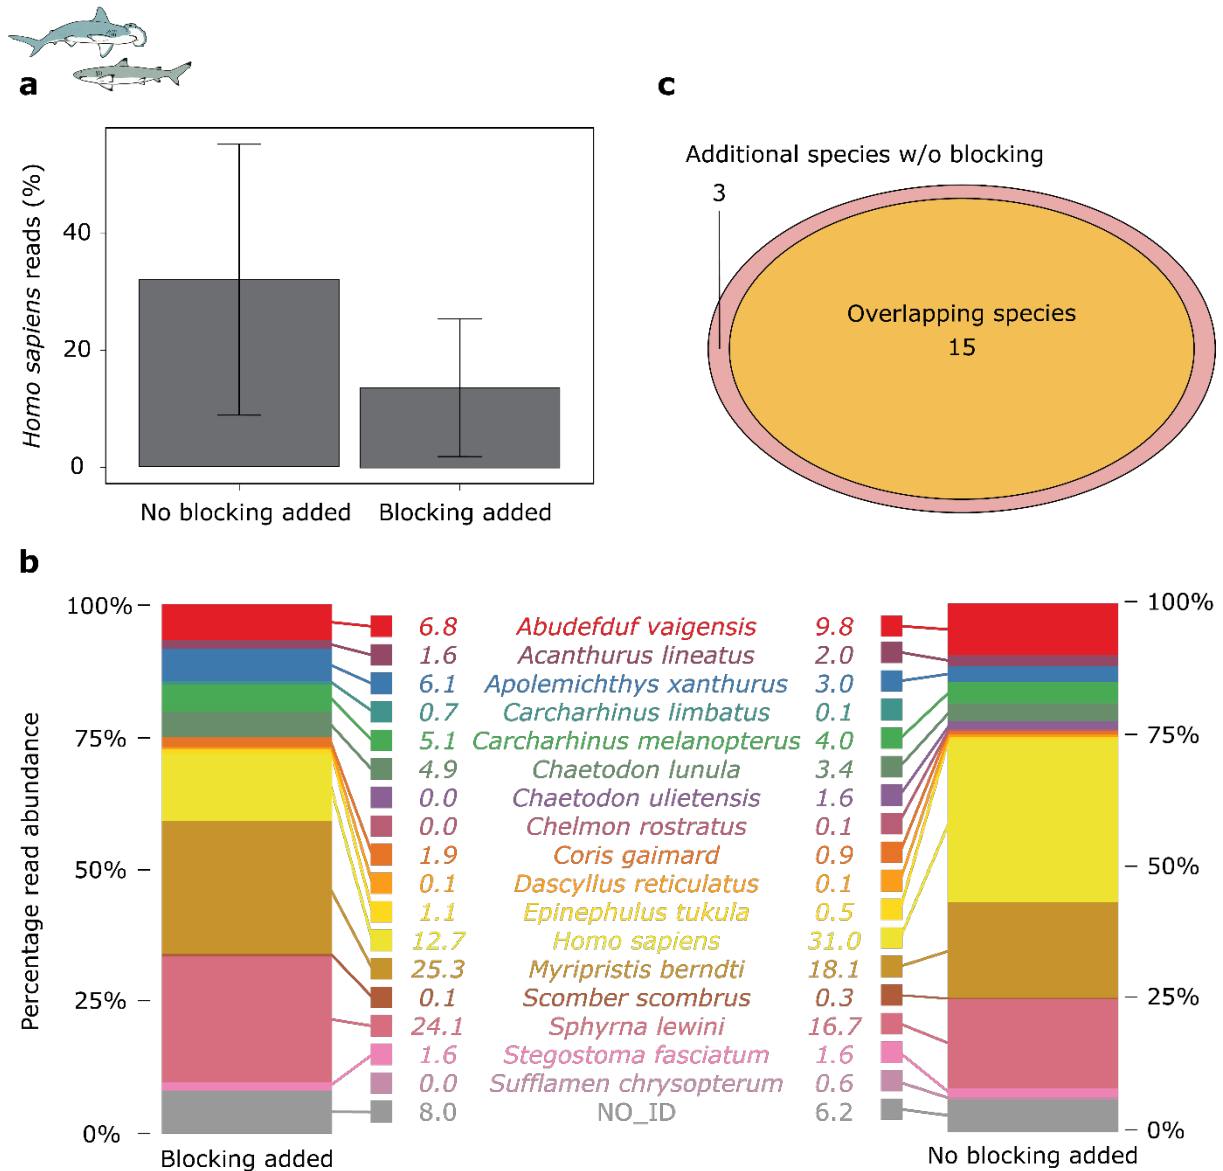

753

754 **Figure 1:** **a)** Represents the relative proportion of *H. sapiens* reads. **b)** Percentage read abundance plot  
 755 of the species found when adding an oligo blocking primer (first) or without adding an oligo blocking primer.  
 756 The different colors represent the species found. In the **c)**, Euler-diagram the amount of overlapping and  
 757 unique species are visualized. Red represents the species found when no blocking primer was added while  
 758 yellow represent the found species when the blocking primer was added.

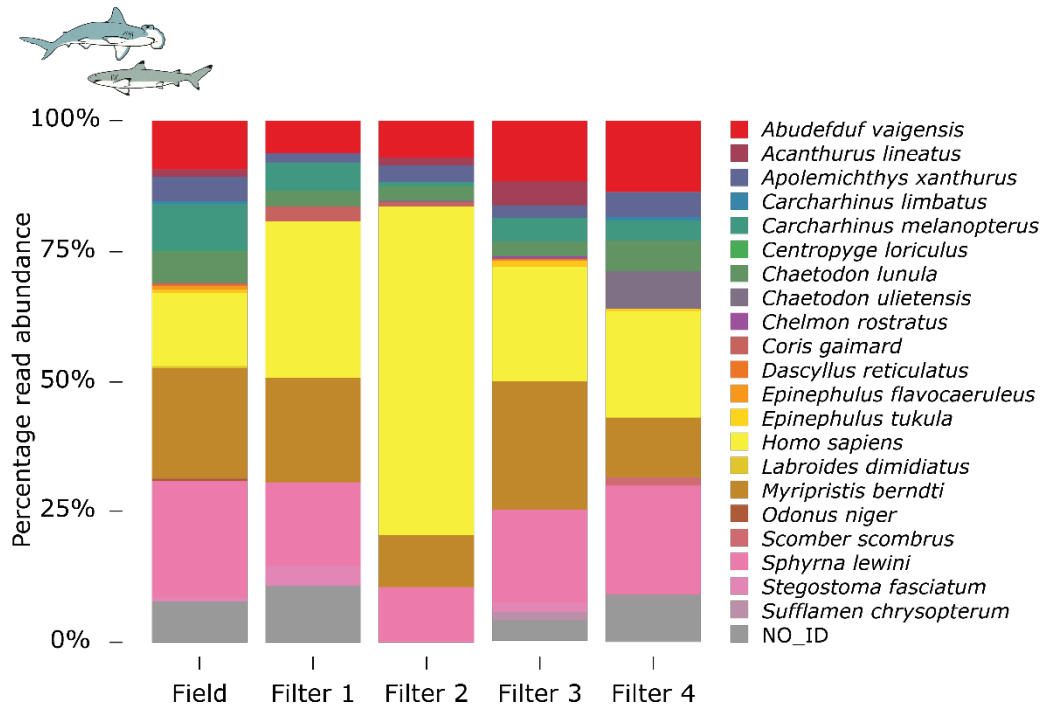

760 **Figure 2:** Percentage read abundance plot of the sample processed at the field site and different filter  
 761 replicates processed in the lab, all collected from the curated Ocean aquarium at Burgers' Zoo. Filters  
 762 represent samples where no blocking primer was added. Colours indicate the proportion of reads found for  
 763 each species.

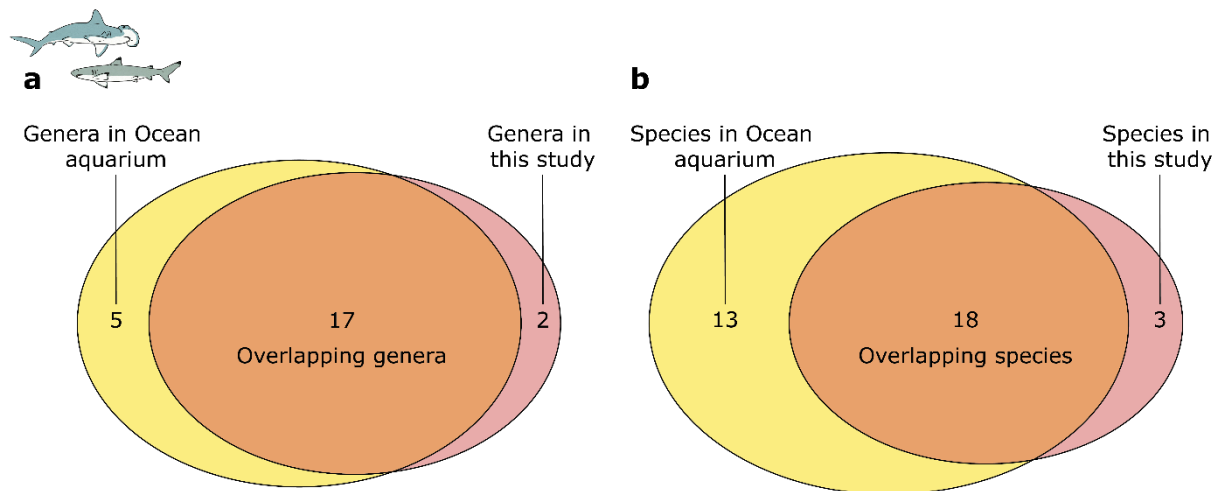

765 **Figure 3:** Euler-diagrams of the amount of overlapping and unique taxa in the samples. Yellow represents  
766 the total amount of taxa present in the Ocean aquarium but not found in this data. Orange represents the  
767 taxa found in both aquarium and eDNA method, while red represents the taxa found in the eDNA samples  
768 that are not present in the aquarium (false positives). Diagram **a)** represents the overlapping genera while  
769 **b)** represents the overlapping species.

770

771

772

773

774

775

776

777

778

779

780

781

782

783

784

785

786

787

788

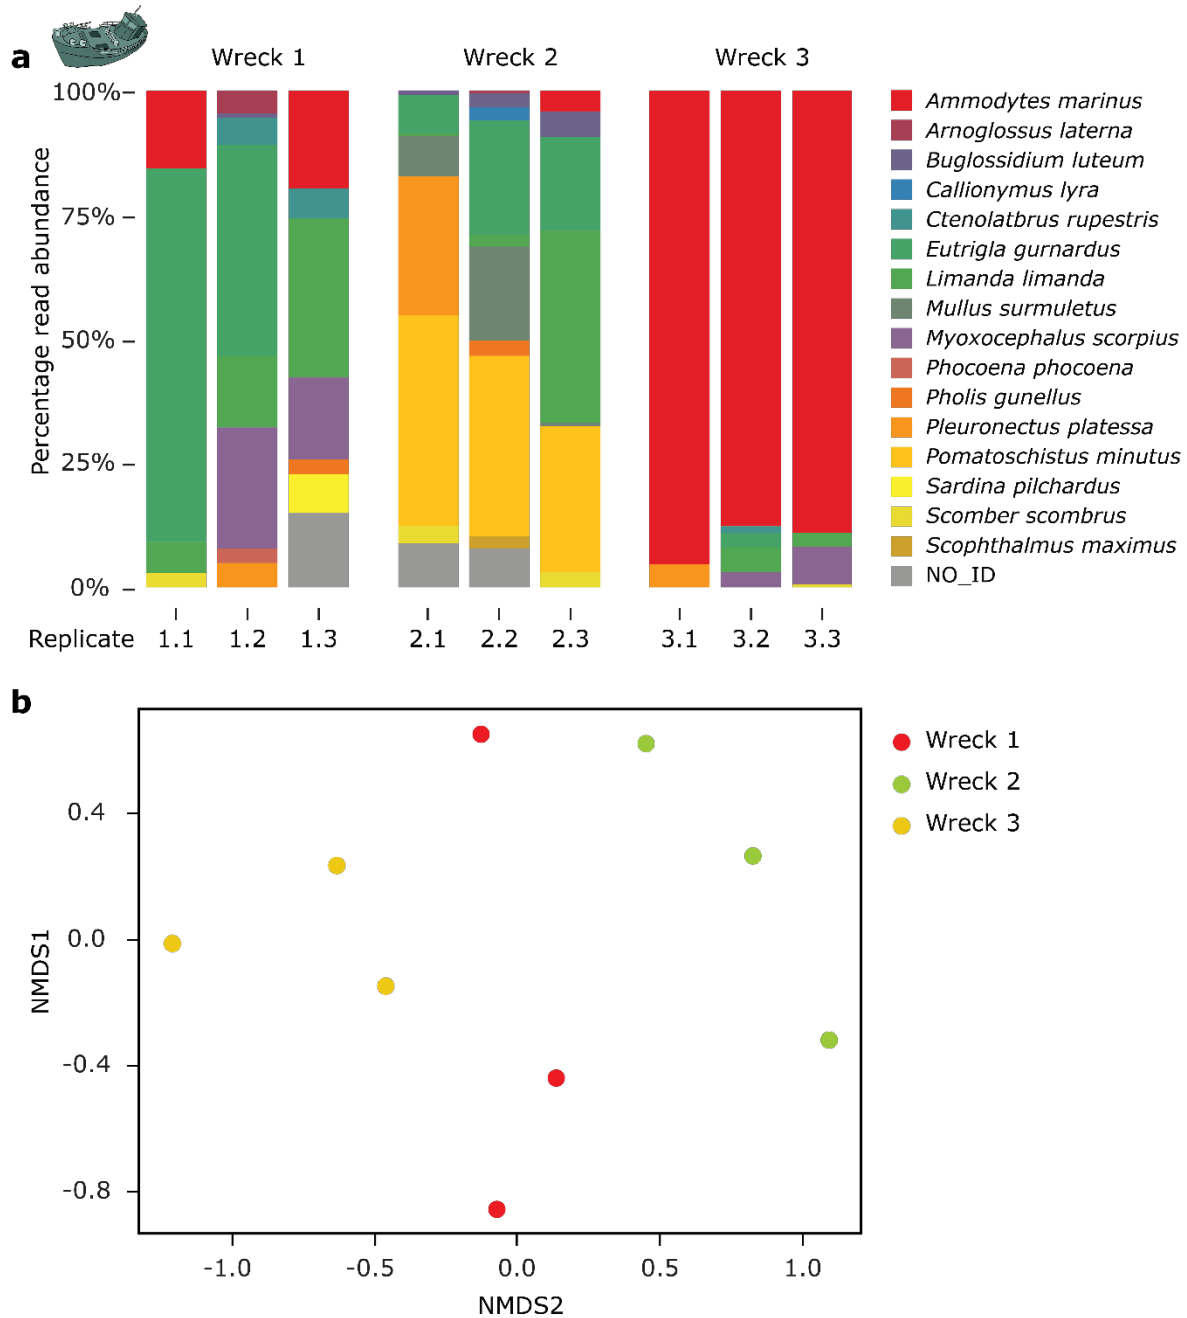

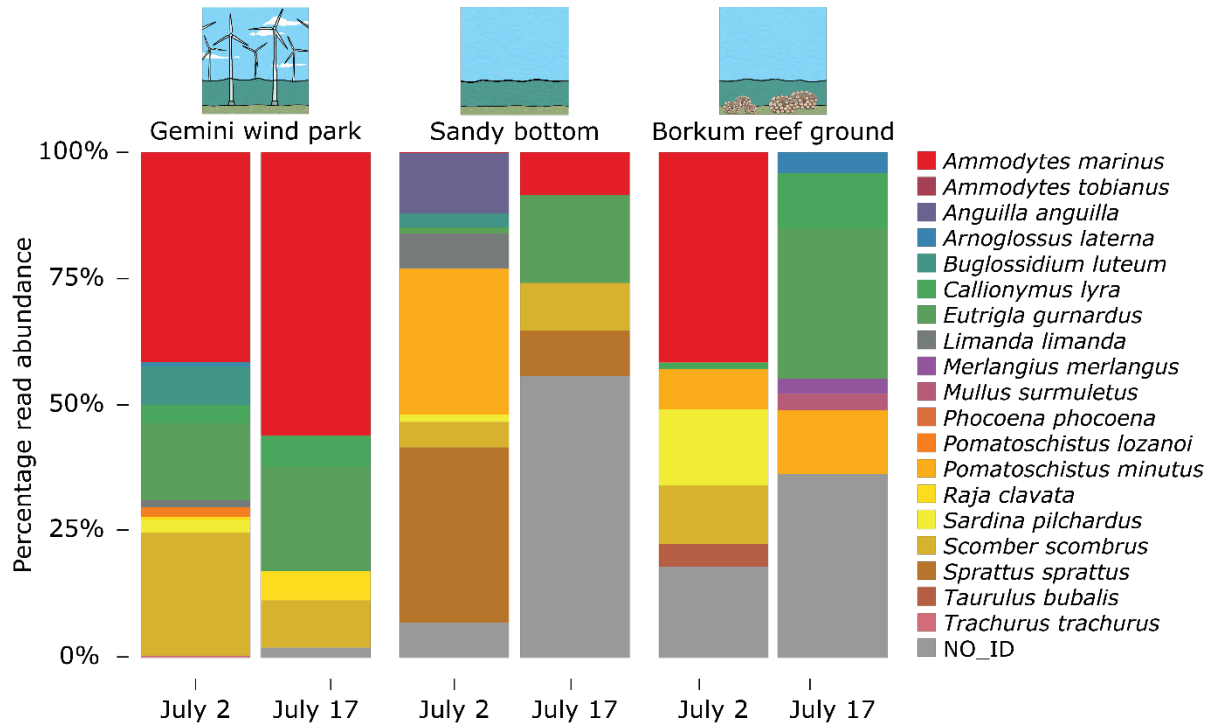

794

795 **Figure 4:** Percentage read abundance plot of the marine vertebrate species in the locations Gemini wind  
 796 park, at sandy bottom halfway Gemini wind park and the Borkum reef grounds and at the Borkum reef  
 797 grounds. Bars indicate at which date the water samples were taken. Colours indicate the proportion read  
 798 abundance of the identified fish species.

799

800

801

802

803

804

805

806

807

808

809

810

811 **Table 2:** Comparison of identification sensitivity to the used reference database. The presence of the  
 812 species in this study is also compared with the completeness of the database to determine the expected  
 813 Identification status (expected ID status). Genus and species show genera and species present in the  
 814 Ocean aquarium, ID represents whether the method detected the species or not. Database represent the  
 815 availability of that taxon in the database. Expected ID status represents source of insensitivity.  
 816 Misidentification represents the false p

| Genus                 | ID? | Reference available    | Species                            | ID? | Reference available    | expected identification status*      | misidentification           | reference misidentification |
|-----------------------|-----|------------------------|------------------------------------|-----|------------------------|--------------------------------------|-----------------------------|-----------------------------|
| <i>Abudefduf</i>      | YES | Complete mitogenome    | <i>Abudefduf sexfasciatus</i>      | NO  | partial 16s            | other species identified             | <i>Abudefduf vaigiensis</i> | Complete mitogenome         |
| <i>Acanthochromis</i> | NO  | partial 16s            | <i>Acanthochromis polyacanthus</i> | YES | partial 16s            | ID based on incomplete reference     | -                           |                             |
| <i>Acanthurus</i>     | YES | Complete mitogenome    | <i>Acanthurus lineatus</i>         | YES | Complete mitogenome    | ID complete                          | -                           |                             |
|                       |     |                        | <i>Acanthurus tennentii</i>        | NO  | No reference           | unable to identify                   | -                           |                             |
| <i>Apolemichthys</i>  | YES | partial 16s            | <i>Apolemichthys xanthurus</i>     | YES | partial 16s            | ID based on incomplete reference     | -                           |                             |
| <i>Bodianus</i>       | NO  | partial 16s            | <i>Bodianus anthioides</i>         | NO  | partial 16s            | likely undetected                    | -                           |                             |
| <i>Carcharhinus</i>   | YES | Complete mitogenome    | <i>Carcharhinus limbatus</i>       | YES | complete 12s t-val 16s | ID complete                          | -                           |                             |
|                       |     |                        | <i>Carcharhinus melanopterus</i>   | YES | Complete mitogenome    | ID complete                          | -                           |                             |
| <i>Centropyge</i>     | YES | Complete mitogenome    | <i>Centropyge bicolor</i>          | NO  | partial 16s            | likely undetected                    | -                           |                             |
|                       |     |                        | <i>Centropyge loriculus</i>        | YES | Complete mitogenome    | ID complete                          | -                           |                             |
| <i>Chaetodon</i>      | YES | Complete mitogenome    | <i>Chaetodon falcula</i>           | NO  | partial 16s            | ?                                    | -                           |                             |
|                       |     |                        | <i>Chaetodon lunula</i>            | YES | partial 12s            | ID based on incomplete reference     | -                           |                             |
|                       |     |                        | <i>Chaetodon ulietensis</i>        | YES | partial 16s            | ID based on incomplete reference     | -                           |                             |
| <i>Chelmon</i>        | YES | Complete mitogenome    | <i>Chelmon rostratus</i>           | YES | Complete mitogenome    | ID complete                          | -                           |                             |
| <i>Chrysiptera</i>    | NO  | partial 16s            | <i>Chrysiptera parasema</i>        | NO  | No reference           | unable to identify                   | -                           |                             |
| <i>Coris</i>          | YES | partial 16s            | <i>Coris gaimard</i>               | YES | partial 16s            | ID based on incomplete reference     | -                           |                             |
| <i>Ctenochaetus</i>   | NO  | Complete mitogenome    | <i>Ctenochaetus strigosus</i>      | NO  | No reference           | unable to identify/likely undetected | -                           |                             |
| <i>Dascyllus</i>      | YES | partial 16s            | <i>Dascyllus aruanus</i>           | NO  | partial 16s            | ?                                    | -                           |                             |
|                       |     |                        | <i>Dascyllus reticulatus</i>       | YES | partial 16s            | ID based on incomplete reference     | -                           |                             |
|                       |     |                        | <i>Dascyllus trimaculatus</i>      | NO  | partial 16s            | ?                                    | -                           |                             |
| <i>Epinephelus</i>    | YES | Complete mitogenome    | <i>Epinephelus tukula</i>          | YES | Complete mitogenome    | ID complete                          | -                           |                             |
|                       |     |                        | <i>Epinephelus flavoacearuleus</i> | YES | Complete mitogenome    | ID complete                          | -                           |                             |
| <i>Labroides</i>      | YES | complete 12s t-val 16s | <i>Labroides dimidiatus</i>        | YES | complete 12s t-val 16s | ID complete                          | -                           |                             |
| <i>Myripristis</i>    | YES | Complete mitogenome    | <i>Myripristis jacobus</i>         | NO  | No reference           | unable to identify                   | -                           |                             |
|                       |     |                        | <i>Myripristis murdjan</i>         | NO  | partial 16s            | other species identified             | <i>Myripristis berndti</i>  | Complete mitogenome         |
| <i>Odonus</i>         | YES | Complete mitogenome    | <i>Odonus niger</i>                | YES | Complete mitogenome    | ID complete                          | -                           |                             |
| <i>Plectorhinchus</i> | YES | Complete mitogenome    | <i>Plectorhinchus obscurus</i>     | NO  | No reference           | unable to identify                   | -                           |                             |
| <i>Siganus</i>        | NO  | Complete mitogenome    | <i>Siganus vulpinus</i>            | NO  | Complete mitogenome    | Not detected                         | -                           |                             |
| <i>Sphyrna</i>        | YES | Complete mitogenome    | <i>Sphyrna lewini</i>              | YES | Complete mitogenome    | ID complete                          | -                           |                             |
| <i>Stegostoma</i>     | YES | Complete mitogenome    | <i>Stegostoma fasciatum</i>        | YES | Complete mitogenome    | ID complete                          | -                           |                             |
| <i>Sufflamen</i>      | YES | partial 16s            | <i>Sufflamen chrysopterym</i>      | YES | partial 16s            | ID based on incomplete reference     | -                           |                             |
